# Supplementary material for: Evolutionary Evidence of Algal Polysaccharide Degradation Acquisition by Pseudoalteromonas carrageenovora 9T to Adapt to Macroalgal Niches
Source: Front Microbiol. 2018 Nov 22;9:2740. doi: 10.3389/fmicb.2018.02740 (PMC6262041; doi:10.3389/fmicb.2018.02740)
Supplement: Supplementary file 2 [file Table_2.XLSX]

## Sheet: Gal stats table paper
Table S2. Number of annotated genes for each glycoside hydrolase, polysaccharide lyase and sulfatase family in the two chromosomes and the plasmid of Pseudoalteromonas carrageenovora 9T. GH, Glycoside hydrolases; PL, Polysaccharide lyases. Sulfatase gene counts are indicated for each subfamily.
	Glycoside hydrolases																						Glycosyltransferases													Polysaccharide lyases				Sulfatases
	GH1	GH2	GH3	GH5	GH8	GH13	GH15	GH16	GH23	GH31	GH32	GH36	GH42	GH68	GH73	GH77	GH82	GH97	GH103	GH110	GH150	GHnc	GT1	GT2	GT4	GT5	GT9	GT19	GT25	GT28	GT30	GT35	GT51	GT81	GTnc	PL6	PL7_5	PL17_2	PL18	S1_8	S1_15	S1_19	S1_nc	S4	Total number of GH sequences	Total number of GH families	Total number of GT sequences	Total number of GT families	Total number of PL sequences
Chromosome a	2	1	2	0	1	3	1	2	5	1	1	1	0	1	2	0	0	1	0	0	0	1	1	9	6	0	1	1	0	1	1	0	2	0	2	2	1	1	1	0	0	0	0	2	25	15	24	9	5
Chromosome b	0	0	1	1	0	4	0	1	0	0	0	0	0	0	1	1	0	0	1	0	0	0	0	1	1	1	0	0	1	1	0	1	0	1	0	0	0	0	0	0	0	0	0	0	10	7	7	7	0
Plasmid	0	1	0	0	0	0	0	5	0	0	0	0	1	0	0	0	1	0	0	2	2	0	0	0	0	0	0	0	0	0	0	0	0	0	0	0	0	0	0	3	2	2	1	0	12	6	0	0	0
Total	2	2	3	1	1	7	1	8	5	1	1	1	1	1	3	1	1	1	1	2	2	1	1	10	7	1	1	1	1	2	1	1	2	1	2	2	1	1	1	3	2	2	1	2	47	22	31	13	5
[truncated: 3 more columns]
